# Supplementary material for: Physiological Responses to Combat Sports in Metabolic Diseases: A Systematic Review
Source: MDPI journal article supplement (doi:10.3390/jcm11041070), 2022-02-18
Supplement: s1 [file s1]

## Supplementary Material

**Table S1.** Search terms used for literature research.

| Combination of the topics “ <i>combat sport</i> ” and “ <i>metabolic disease</i> ” | combined search-term of all topics was used, split by the “ <i>relevant marker</i> ” key words                                                                                                                                |
|------------------------------------------------------------------------------------|-------------------------------------------------------------------------------------------------------------------------------------------------------------------------------------------------------------------------------|
| 1. ((diabetes mellitus, type 1) AND (martial arts) NOT (Tai Chi))                  | 1. (diabetes mellitus, type 1) OR (diabetes mellitus, type 2) OR (metabolic syndrome) OR (obesity) OR (diabesity) AND (martial arts[tw]) OR (combat sports[tw]) OR (full contact[tw]) OR (light contact[tw]) AND (glucose)    |
| 2. ((diabetes mellitus, type 1) AND (combat sports) NOT (Tai Chi))                 | 2. (diabetes mellitus, type 1) OR (diabetes mellitus, type 2) OR (metabolic syndrome) OR (obesity) OR (diabesity) AND (martial arts[tw]) OR (combat sports[tw]) OR (full contact[tw]) OR (light contact[tw]) AND (MET)        |
| 3. ((diabetes mellitus, type 1) AND (full contact) NOT (Tai Chi))                  | 3. (diabetes mellitus, type 1) OR (diabetes mellitus, type 2) OR (metabolic syndrome) OR (obesity) OR (diabesity) AND (martial arts[tw]) OR (combat sports[tw]) OR (full contact[tw]) OR (light contact[tw]) AND (lactate)    |
| 4. ((diabetes mellitus, type 1) AND (full contact [tw]) NOT (Tai Chi))             | 4. (diabetes mellitus, type 1) OR (diabetes mellitus, type 2) OR (metabolic syndrome) OR (obesity) OR (diabesity) AND (martial arts[tw]) OR (combat sports[tw]) OR (full contact[tw]) OR (light contact[tw]) AND (VO2)        |
| 5. ((diabetes mellitus, type 1) AND (light contact) NOT (Tai Chi))                 | 5. (diabetes mellitus, type 1) OR (diabetes mellitus, type 2) OR (metabolic syndrome) OR (obesity) OR (diabesity) AND (martial arts[tw]) OR (combat sports[tw]) OR (full contact[tw]) OR (light contact[tw]) AND (heart rate) |
| 6. ((diabetes mellitus, type 1) AND (light contact [tw]) NOT (Tai Chi))            |                                                                                                                                                                                                                               |
| 7. ((diabetes mellitus, type 2) AND (martial arts) NOT (Tai Chi))                  |                                                                                                                                                                                                                               |
| 8. ((diabetes mellitus, type 2) AND (combat sports) NOT (Tai Chi))                 |                                                                                                                                                                                                                               |
| 9. ((diabetes mellitus, type 2) AND (full contact) NOT (Tai Chi))                  |                                                                                                                                                                                                                               |
| 10. ((diabetes mellitus, type 2) AND (full contact [tw]) NOT (Tai Chi))            |                                                                                                                                                                                                                               |
| 11. ((diabetes mellitus, type 2) AND (light contact) NOT (Tai Chi))                |                                                                                                                                                                                                                               |
| 12. ((diabetes mellitus, type 2) AND (light contact[tw]) NOT (Tai Chi))            |                                                                                                                                                                                                                               |
| 13. ((metabolic syndrome) AND (martial arts) NOT (Tai Chi))                        |                                                                                                                                                                                                                               |
| 14. ((metabolic syndrome) AND (combat sports) NOT (Tai Chi))                       |                                                                                                                                                                                                                               |
| 15. ((metabolic syndrome) AND (combat sports[tw]) NOT (Tai Chi))                   |                                                                                                                                                                                                                               |
| 16. ((metabolic syndrome) AND (full contact) NOT (Tai Chi))                        |                                                                                                                                                                                                                               |
| 17. ((metabolic syndrome) AND (full contact [tw]) NOT (Tai Chi))                   |                                                                                                                                                                                                                               |
| 18. ((metabolic syndrome) AND (light contact) NOT (Tai Chi))                       |                                                                                                                                                                                                                               |
| 19. ((metabolic syndrome) AND (light contact[tw]) NOT (Tai Chi))                   |                                                                                                                                                                                                                               |
| 20. ((obesity) AND (martial arts) NOT (Tai Chi))                                   |                                                                                                                                                                                                                               |

|                                                                                                                                                                                                                                  |  |
|----------------------------------------------------------------------------------------------------------------------------------------------------------------------------------------------------------------------------------|--|
| 21. ((obesity) AND (combat sports) NOT (Tai Chi))                                                                                                                                                                                |  |
| 22. ((obesity) AND (combat sports[tw]) NOT (Tai Chi))                                                                                                                                                                            |  |
| 23. ((obesity) AND (full contact) NOT (Tai Chi))                                                                                                                                                                                 |  |
| 24. ((obesity) AND (full contact[tw]) NOT (Tai Chi))                                                                                                                                                                             |  |
| 25. ((obesity) AND (light contact) NOT (Tai Chi))                                                                                                                                                                                |  |
| 26. ((obesity) AND (light contact[tw]) NOT (Tai Chi))                                                                                                                                                                            |  |
| 27. ((diabesity) AND (martial arts) NOT (Tai Chi))                                                                                                                                                                               |  |
| 28. ((diabesity) AND (combat sports) NOT (Tai Chi))                                                                                                                                                                              |  |
| 29. ((diabesity) AND (full contact) NOT (Tai Chi))                                                                                                                                                                               |  |
| 30. ((diabesity) AND (light contact) NOT (Tai Chi))                                                                                                                                                                              |  |
| 31. ((diabetes mellitus, type 1) OR (diabetes mellitus, type 2) OR (metabolic syndrome) OR (obesity) OR (diabesity)) AND ((martial arts[tw]) OR (combat sports[tw]) OR (full contact[tw]) OR (light contact[tw])) NOT (Tai Chi)) |  |
